# Supplementary material for: A hexokinase isoenzyme switch in human liver cancer cells promotes lipogenesis and enhances innate immunity
Source: Springer Nature journal article supplement (doi:10.1038/s42003-021-01749-3), 2021-02-16
Supplement: MOESM3 [file 42003_2021_1749_MOESM3_ESM.pdf › 42003_2021_1749_MOESM3_ESM.pdf]

## **Description of Additional Supplementary Files**

**File name:** Supplementary Data 1

**Description:** RNA-seq data of 365 HCC biopsies from The Cancer Genome Atlas (TCGA) database. Related to Figure 1.

**File name:** Supplementary Data 2

**Description:** Transcriptomic profiles of Huh7 and Huh7-*GCK*<sup>+</sup>/*HK2*<sup>-</sup> cells.

**File name:** Supplementary Data 3

**Description:** Gene set enrichment data from Ingenuity Pathway Analysis (IPA).

**File name:** Supplementary Data 4

**Description:** Source data for main and supplementary figures.
